# Supplementary material
Source: PubMed Central journal article supplement (PMC6011177)
Supplement: ac8b00650_si_001.pdf [file ac8b00650_si_001.pdf]

# Quantification of cellular folate species by LC-MS after stabilization by derivatization

Matthias Schittmayer\*<sup>†‡§</sup>, Ruth Birner-Gruenberger\*<sup>†§</sup>, Nicola Zamboni<sup>‡</sup>

<sup>†</sup> Gottfried Schatz Research Center, Molecular Biology and Biochemistry, Medical University of Graz, Stiftingtalstrasse 2, 8010 Graz, Austria

<sup>‡</sup> Institute of Molecular Systems Biology, ETH Zürich, 8093 Zürich, Switzerland

<sup>§</sup> Omics Center Graz, BioTechMed-Graz, 8010 Graz, Austria

\*Phone: +43 (0)316 385-72726. E-mail: [matthias.schittmayer@medunigraz.at](mailto:matthias.schittmayer@medunigraz.at)

\*Phone: +43 (0)316 385-72962. E-mail: [ruth.birner-gruenberger@medunigraz.at](mailto:ruth.birner-gruenberger@medunigraz.at)

## Table of contents

|                                                                                                           |    |
|-----------------------------------------------------------------------------------------------------------|----|
| Fig. S1: Chromatographic separation and specific fragmentation patterns of 5- and 10-formylTHF-Glu1. .... | 2  |
| Fig. S2: Fragment spectra of isotopologues of 5,10-dimethylTHF-Glu1 in ascending m/z order. ....          | 3  |
| Fig. S3: Completeness and selectivity of derivatization reactions .....                                   | 4  |
| Fig. S4: Calibration of derivatized mono-glutamated folates.....                                          | 5  |
| Fig. S5: Distribution of folate species in E. coli K12 grown on complex medium.....                       | 5  |
| Fig. S6: Chromatographic separation of polyglutamation states.....                                        | 6  |
| Fig. S7: Retention time standards of polyglutamation states. ....                                         | 7  |
| Table S1: Analyte coverage of published methods. ....                                                     | 8  |
| Table S2: List of transitions for scheduled MRM method. ....                                              | 9  |
| Bibliography supporting information .....                                                                 | 12 |

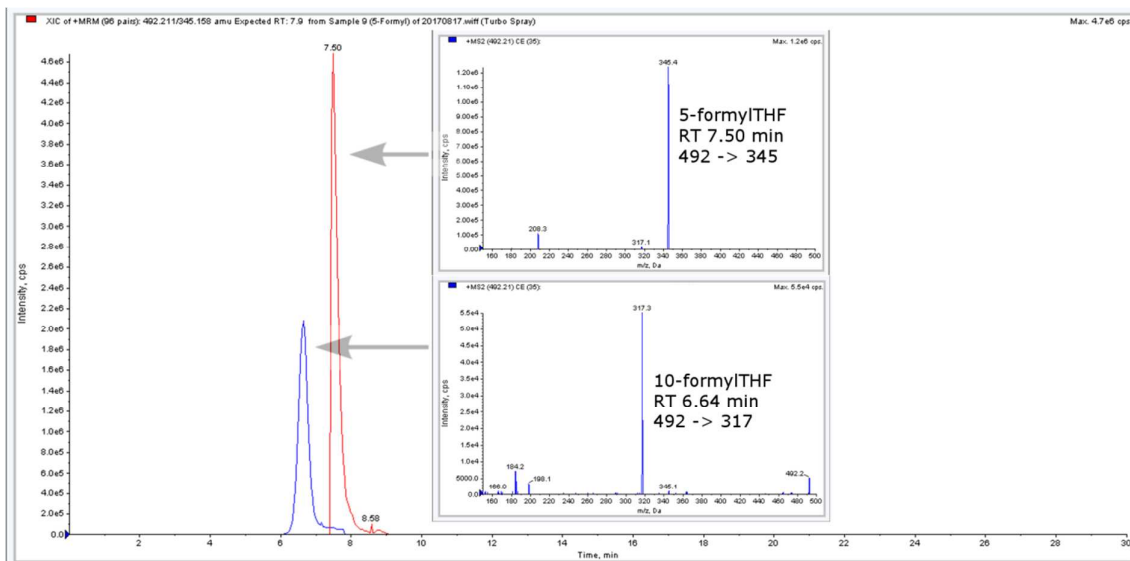

**Fig. S1: Chromatographic separation and specific fragmentation patterns of 5- and 10-formylTHF-Glu1.**

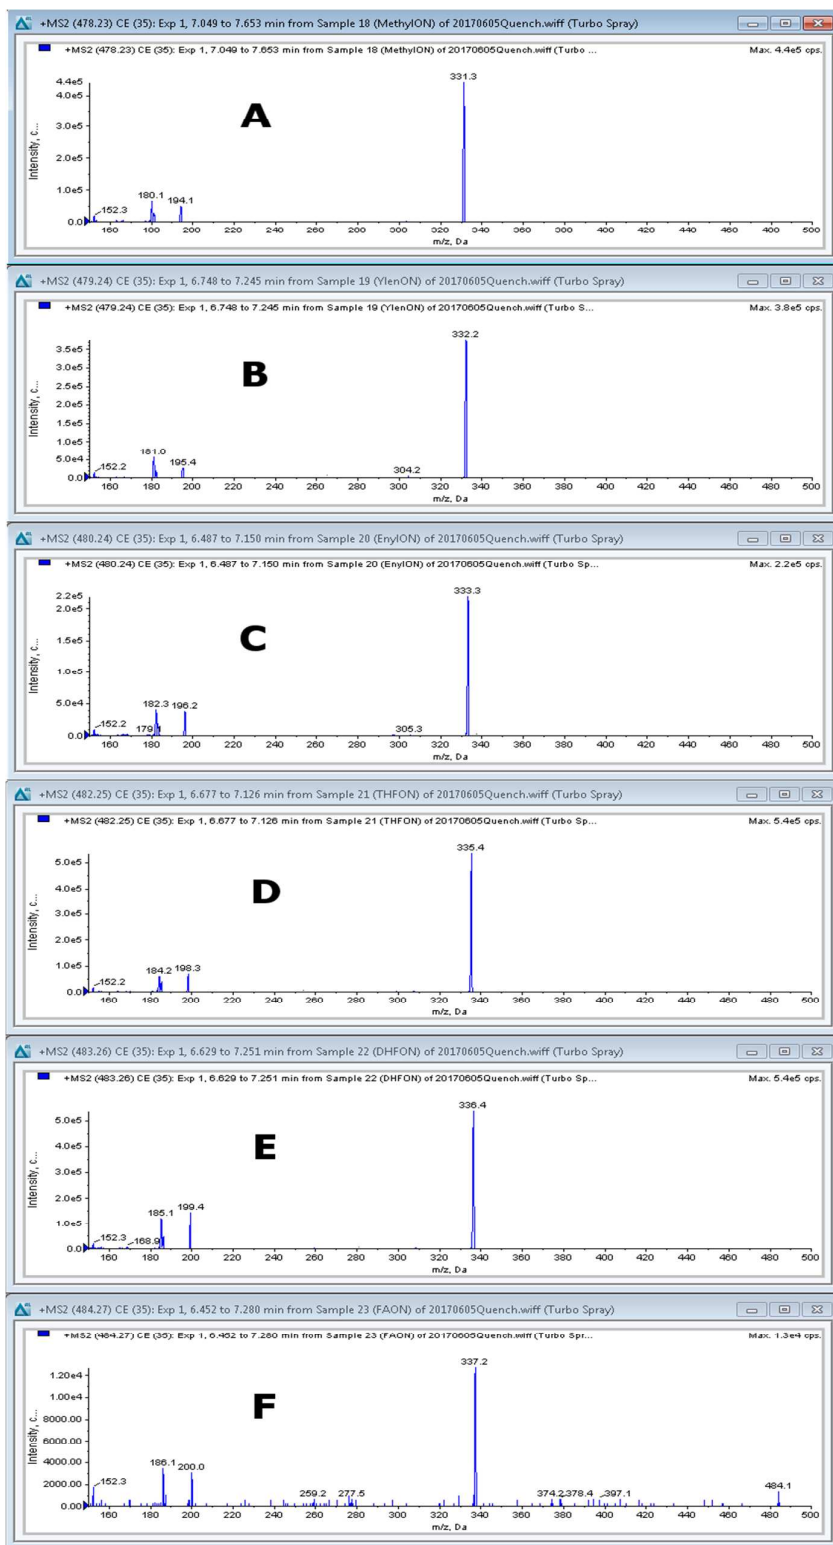

**Fig. S2: Fragment spectra of istopologues of 5,10-dimethylTHF-Glu1 in ascending m/z order.** A: derivative of 5-methylTHF-Glu1; B: derivative of 5,10-methylenTHF-Glu1; C: derivative of 5,10-methenylTHF-Glu1; D: derivative of THF-Glu1; E: derivative of DHF-Glu1; F: derivative of FA -Glu1.

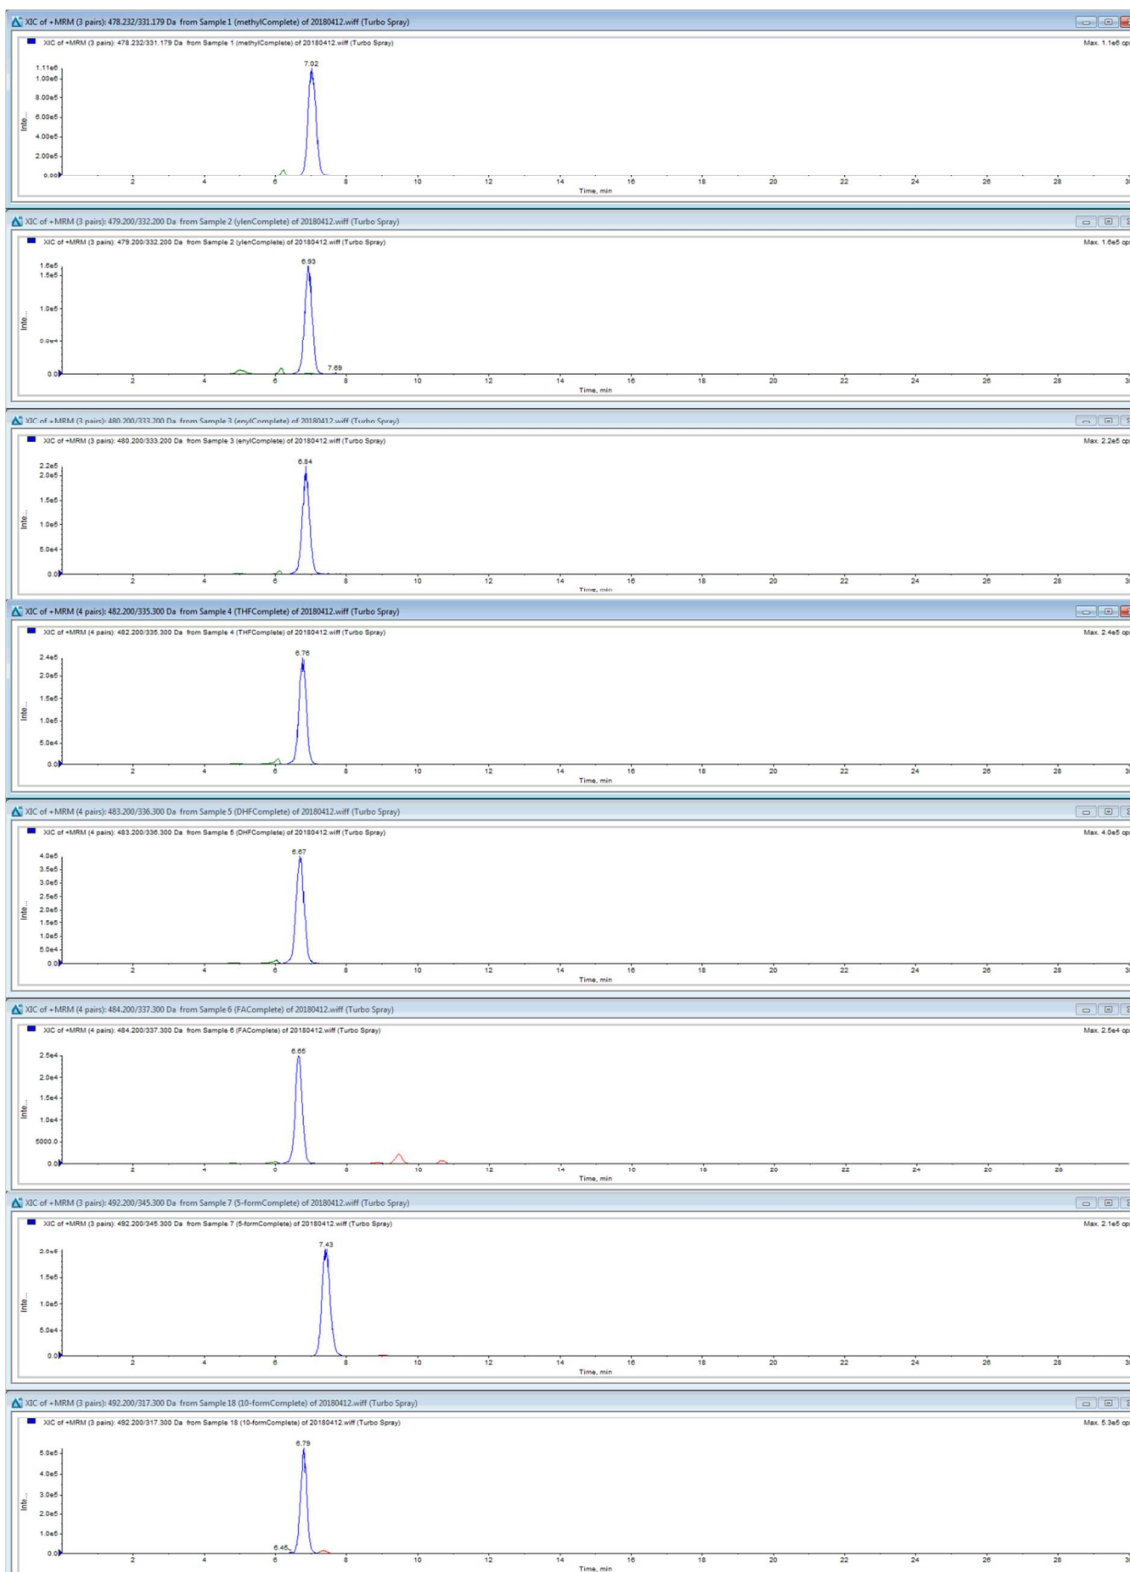

**Fig. S3: Completeness and selectivity of derivatization reactions**

Blue trace: expected product. Green trace: overmethylated compounds. Red trace: underivatized compound. Grey trace: undermethylated compound (where applicable). Top to bottom: 5-methylTHF; 5,10-methyleneTHF; 5,10-methenylTHF; THF; DHF; folic acid; 5-formylTHF, 10-formylTHF

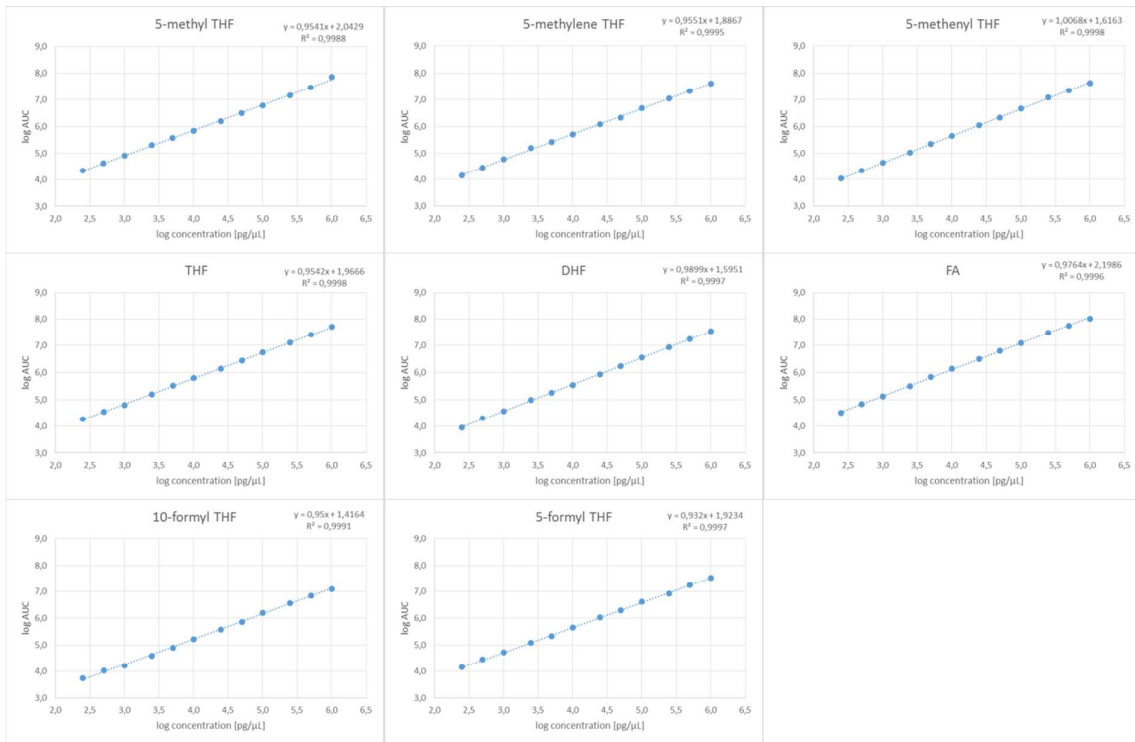

**Fig. S4: Calibration of derivatized mono-glutamated folates.** Both axes were weighted logarithmically.

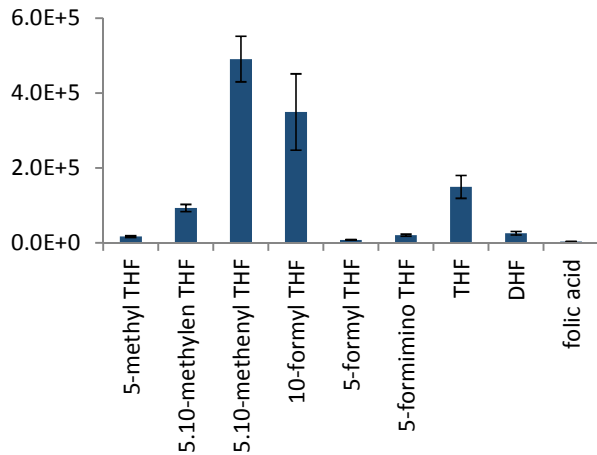

**Fig. S5: Distribution of folate species in *E. coli* K12 grown on complex medium.** Polyglutamation n=3.

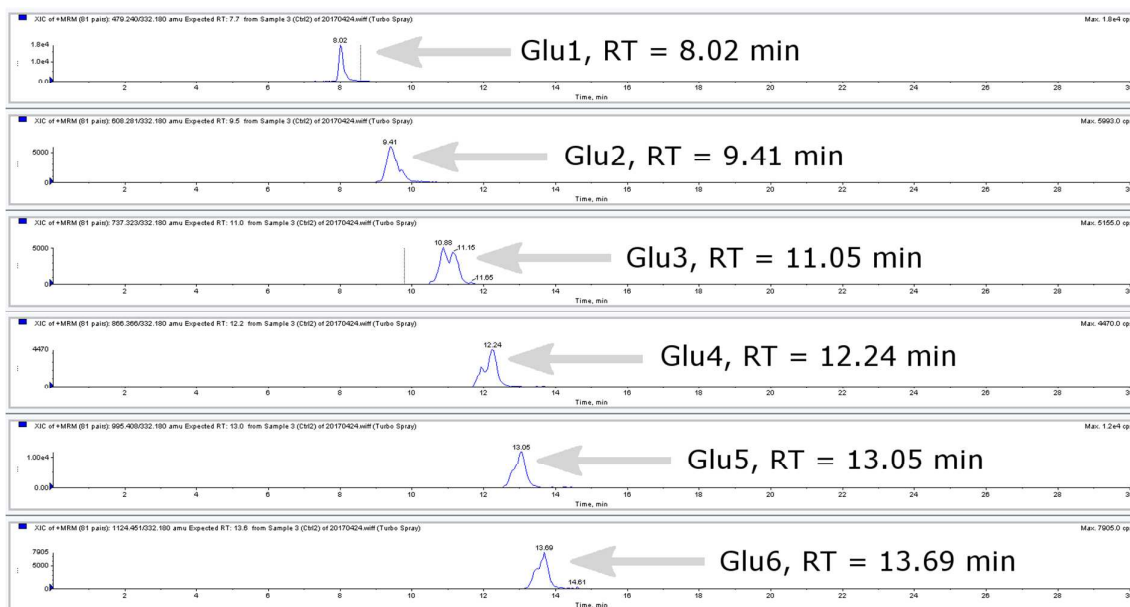

**Fig. S6: Chromatographic separation of polyglutamation states.** 5,10-methyleneTHF peaks of HepG2 cell extracts are shown with ascending polyglutamation number.

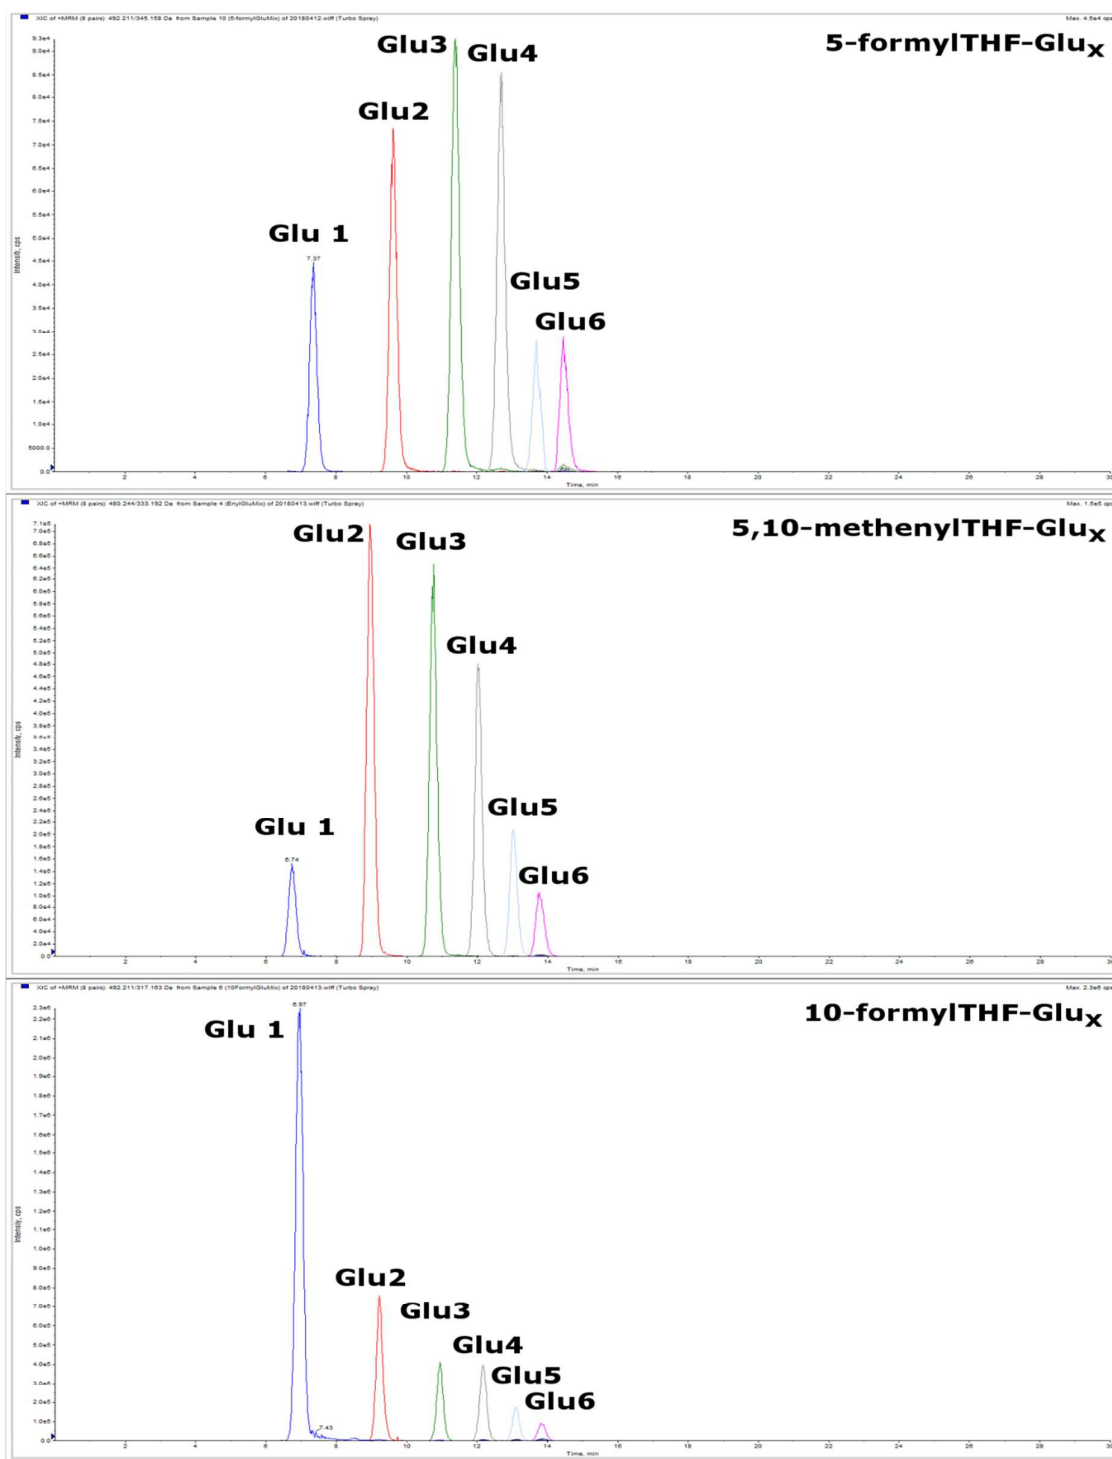

**Fig. S7: Retention time standards of polyglutamation states.** Top to bottom: derivatives of commercially available 5-formylTHF-Glu1 to Glu6; self-synthesized derivatives of 5,10-methenylTHF Glu1 to Glu6 (retention time standard for all 6 isotopologues); self-synthesized derivatives of 10-formylTHF-Glu1 to Glu6. 5,10-methenylTHF and 10-formylTHF standards were synthesized stepwise by pH shift from pH = 6.5 to pH = 1 (5,10-methenylTHF) and from pH = 1 to pH = 11 (10-formylTHF) and subsequent derivatization. Conversion was not complete in all cases and 10-formylTHF is prone to degradation before derivatization. Thus, self-synthesized standards were only used as retention time references.

**Table S1: Analyte coverage of published methods.** green tick: species covered individually by method verified by authentic standard; purple wave: species covered individually by method but no standard available; blue P: species measured as pool; red cross: not covered by method; 1) more than a single sample preparation and/or analytical run required; 2) it is unclear whether 5,10-methenylTHF was analysed separately as no transition is reported. Based on the 2013 paper by the same authors, the majority of 5,10-methenylTHF will convert to 5-formyl-THF during deconjugation under the conditions used. 10-formylTHF was measured in the pteridine ring oxidized forms 10-formylDHF and 10-formyl folic acid; 3) The authors reported interconversion of 5,10-methenylTHF to 5-formylTHF. To prevent this, they used a pH of 7.4. The 10-formyl species were measured in the ring oxidized form 10-formyl folic acid; 4) A pool of 5-formylTHF, 10-formylTHF and 5,10-methenylTHF was determined after acidification; 5) No measures to stabilize 5,10-methyleneTHF were reported.<sup>1, 2, 3, 4, 5, 6, 7, 8</sup>

|                  | Schittmayer<br>2018 | Chen<br>2017<br><b>1)</b> | Ringling<br>2017<br><b>2)</b> | Kiekens<br>2015<br><b>3)</b> | Haandel<br>2012<br><b>4)</b> | Kwon<br>2008<br><b>5)</b> | Lu<br>2007<br><b>5)</b> | Garratt<br>2005<br><b>5)</b> |
|------------------|---------------------|---------------------------|-------------------------------|------------------------------|------------------------------|---------------------------|-------------------------|------------------------------|
| 5-methylTHF      | ✓                   | ✓                         | ✓                             | ✓                            | ✓                            | ✓                         | ✓                       | ✓                            |
| 5,10-methylenTHF | ✓                   | ✓                         | ✗                             | ✗                            | ✗                            | 5)                        | 5)                      | 5)                           |
| 5,10-methenylTHF | ✓                   | P                         | ✓<br>P                        | ✓<br>P                       | P                            | ✗                         | ✓                       | ✓                            |
| THF              | ✓                   | ✓                         | ✓                             | ✓                            | ✓                            | ✓                         | ✓                       | ✓                            |
| DHF              | ✓                   | ✓                         | ✗                             | ✗                            | ✗                            | ✓                         | ✓                       | ✓                            |
| folic acid       | ✓                   | ✗                         | ✓                             | ✓                            | ✗                            | ✓                         | ✓                       | ✓                            |
| 5-formylTHF      | ✓                   | ✓                         | ✓<br>P                        | ✓<br>P                       | ✓                            | P                         | P                       | P                            |
| 10-formylTHF     | ✓                   | P                         | 2)                            | 3)                           | ✗                            | P                         | P                       | P                            |
| 5-formiminoTHF   | ~                   | ✗                         | ✗                             | ✗                            | ✗                            | ✗                         | ✗                       | ✗                            |



**Table S2: List of transitions for scheduled MRM method.** Parents (Q1 Mass) indicated with \* are doubly charged species. All analytes are representing their derivatives after reductive alkylation with labelled reagents.

| Analyte                    | Q1 Mass (Da) | Q2 Mass (Da) | Time (min) | DP (volts) | CE (volts) |
|----------------------------|--------------|--------------|------------|------------|------------|
| 5-methylTHF-Glu1           | 478.232      | 331.179      | 7.0        | 110        | 35         |
| 5,10-methylen-Glu1         | 479.238      | 332.185      | 7.0        | 110        | 35         |
| 5,10-methenyl-Glu1         | 480.244      | 333.192      | 7.0        | 110        | 35         |
| THF-Glu1                   | 482.254      | 335.201      | 7.0        | 110        | 35         |
| DHF-Glu1                   | 483.260      | 336.208      | 7.0        | 110        | 35         |
| FA-Glu1                    | 484.267      | 337.214      | 7.0        | 110        | 35         |
| 5-formylTHF-Glu1           | 492.211      | 345.158      | 7.9        | 110        | 35         |
| 10-formylTHF-Glu1          | 492.211      | 317.163      | 7.3        | 110        | 35         |
| 5-formiminoTHF-Glu1        | 494.249      | 347.196      | 7.1        | 110        | 35         |
| Int. Std. 5-methyl-THFGlu1 | 474.210      | 327.157      | 7.9        | 110        | 35         |
| 5-methylTHF-Glu2           | 607.274      | 331.179      | 9.4        | 110        | 44         |
| 5,10-methylen-Glu2         | 608.281      | 332.185      | 9.4        | 110        | 44         |
| 5,10-methenyl-Glu2         | 609.287      | 333.192      | 9.4        | 110        | 44         |
| THF-Glu2                   | 611.297      | 335.201      | 9.4        | 110        | 44         |
| DHF-Glu2                   | 612.303      | 336.208      | 9.4        | 110        | 44         |
| FA-Glu2                    | 613.309      | 337.214      | 9.4        | 110        | 44         |
| 5-formylTHF-Glu2           | 621.254      | 345.158      | 10.2       | 110        | 44         |
| 10-formylTHF-Glu2          | 621.254      | 317.163      | 9.8        | 110        | 44         |
| 5-formiminoTHF-Glu2        | 623.292      | 347.196      | 9.5        | 110        | 44         |
| 5-methylTHF-Glu3           | 736.317      | 331.179      | 11.1       | 110        | 54         |
| 5,10-methylen-Glu3         | 737.323      | 332.185      | 11.1       | 110        | 54         |
| 5,10-methenyl-Glu3         | 738.330      | 333.192      | 11.1       | 110        | 54         |
| THF-Glu3                   | 740.339      | 335.201      | 11.1       | 110        | 54         |
| DHF-Glu3                   | 741.345      | 336.208      | 11.1       | 110        | 54         |
| FA-Glu3                    | 742.352      | 337.214      | 11.1       | 110        | 54         |

|                     |          |         |      |     |    |
|---------------------|----------|---------|------|-----|----|
| 5-formylTHF-Glu3    | 750.296  | 345.158 | 11.9 | 110 | 53 |
| 10-formylTHF-Glu3   | 750.296  | 317.163 | 11.4 | 110 | 53 |
| 5-formiminoTHF-Glu3 | 752.334  | 347.196 | 11.2 | 110 | 53 |
| 5-methylTHF-Glu4    | 865.360  | 331.179 | 12.3 | 110 | 63 |
| 5,10-methylen-Glu4  | 866.366  | 332.185 | 12.3 | 110 | 63 |
| 5,10-methenyl-Glu4  | 867.372  | 333.192 | 12.3 | 110 | 63 |
| THF-Glu4            | 869.382  | 335.201 | 12.3 | 110 | 63 |
| DHF-Glu4            | 870.388  | 336.208 | 12.3 | 110 | 63 |
| FA-Glu4             | 871.394  | 337.214 | 12.3 | 110 | 63 |
| 5-formylTHF-Glu4    | 879.339  | 345.158 | 13.0 | 110 | 63 |
| 10-formylTHF-Glu4   | 879.339  | 317.163 | 12.5 | 110 | 63 |
| 5-formiminoTHF-Glu4 | 881.377  | 347.196 | 12.4 | 110 | 62 |
| 5-methylTHF-Glu5    | 994.402  | 331.179 | 13.1 | 110 | 73 |
| 5,10-methylen-Glu5  | 995.408  | 332.185 | 13.1 | 110 | 73 |
| 5,10-methenyl-Glu5  | 996.415  | 333.192 | 13.1 | 110 | 73 |
| THF-Glu5            | 998.424  | 335.201 | 13.1 | 110 | 72 |
| DHF-Glu5            | 999.431  | 336.208 | 13.1 | 110 | 72 |
| FA-Glu5             | 1000.437 | 337.214 | 13.1 | 110 | 72 |
| 5-formylTHF-Glu5    | 1008.381 | 345.158 | 13.7 | 110 | 72 |
| 10-formylTHF-Glu5   | 1008.381 | 317.163 | 13.3 | 110 | 72 |
| 5-formiminoTHF-Glu5 | 1010.419 | 347.196 | 13.2 | 110 | 72 |
| 5-methylTHF-Glu6    | 1123.445 | 331.179 | 13.8 | 110 | 82 |
| 5,10-methylen-Glu6  | 1124.451 | 332.185 | 13.8 | 110 | 82 |
| 5,10-methenyl-Glu6  | 1125.457 | 333.192 | 13.8 | 110 | 82 |
| THF-Glu6            | 1127.467 | 335.201 | 13.8 | 110 | 82 |
| DHF-Glu6            | 1128.473 | 336.208 | 13.8 | 110 | 82 |
| FA-Glu6             | 1129.479 | 337.214 | 13.8 | 110 | 82 |
| 5-formylTHF-Glu6    | 1137.424 | 345.158 | 14.4 | 110 | 81 |
| 10-formylTHF-Glu6   | 1137.424 | 317.163 | 14.0 | 110 | 81 |
| 5-formiminoTHF-Glu6 | 1139.462 | 347.196 | 13.9 | 110 | 81 |

|                     |          |         |      |     |    |
|---------------------|----------|---------|------|-----|----|
| 5-methylTHF-Glu7    | *627.251 | 331.179 | 14.4 | 110 | 70 |
| 5,10-methylen-Glu7  | *627.754 | 332.185 | 14.4 | 110 | 70 |
| 5,10-methenyl-Glu7  | *628.761 | 333.192 | 14.4 | 110 | 70 |
| THF-Glu7            | *634.758 | 335.201 | 14.4 | 110 | 70 |
| DHF-Glu7            | *635.763 | 336.208 | 14.4 | 110 | 70 |
| FA-Glu7             | *636.766 | 337.214 | 14.4 | 110 | 70 |
| 5-formylTHF-Glu7    | *641.734 | 345.158 | 14.9 | 110 | 70 |
| 10-formylTHF-Glu7   | *641.237 | 317.163 | 14.5 | 110 | 70 |
| 5-formiminoTHF-Glu7 | *643.755 | 347.196 | 14.4 | 110 | 70 |
| 5-methylTHF-Glu8    | *691.772 | 331.179 | 14.9 | 110 | 70 |
| 5,10-methylen-Glu8  | *692.276 | 332.185 | 14.9 | 110 | 70 |
| 5,10-methenyl-Glu8  | *693.282 | 333.192 | 14.9 | 110 | 70 |
| THF-Glu8            | *699.280 | 335.201 | 14.9 | 110 | 70 |
| DHF-Glu8            | *700.285 | 336.208 | 14.9 | 110 | 70 |
| FA-Glu8             | *701.288 | 337.214 | 14.9 | 110 | 70 |
| 5-formylTHF-Glu8    | *706.256 | 345.158 | 15.4 | 110 | 70 |
| 10-formylTHF-Glu8   | *705.758 | 317.163 | 15.0 | 110 | 70 |
| 5-formiminoTHF-Glu8 | *708.277 | 347.196 | 14.9 | 110 | 70 |
| glycine             | 112.115  | 66.110  | 6.5  | 50  | 30 |
| serine              | 142.126  | 96.121  | 6.9  | 50  | 25 |
| SAM                 | 435.221  | 250.093 | 8.4  | 30  | 35 |
| SAH                 | 421.205  | 170.300 | 5.3  | 35  | 25 |
| 3-phospho-serine    | 222.092  | 176.087 | 9.5  | 30  | 30 |
| TMP                 | 323.064  | 80.973  | 7.5  | 30  | 30 |
| IMP                 | 349.054  | 137.046 | 10.1 | 60  | 20 |
| AICAR               | 339.070  | 127.061 | 9.7  | 50  | 20 |
| 3-phospho-glycerate | 187.000  | 98.980  | 11.4 | 30  | 25 |
| NAD+                | 664.120  | 524.058 | 8.5  | 60  | 30 |
| NADH                | 666.130  | 649.106 | 7.8  | 60  | 30 |
| NADP+               | 744.083  | 604.025 | 11.4 | 60  | 30 |

|                       |         |         |      |    |    |
|-----------------------|---------|---------|------|----|----|
| NADPH                 | 746.098 | 729.072 | 11.5 | 60 | 30 |
| Sarcosine             | 108.093 | 62.088  | 6.6  | 50 | 30 |
| N,N- dimethylglycine  | 104.071 | 58.066  | 6.6  | 50 | 30 |
| Betaine               | 118.086 | 58.066  | 6.0  | 50 | 35 |
| Choline               | 104.107 | 60.081  | 11.6 | 50 | 35 |
| methionine            | 186.134 | 133.032 | 4.6  | 30 | 20 |
| homocysteine          | 172.118 | 126.122 | 5.2  | 30 | 20 |
| cysteine              | 158.103 | 58.995  | 5.7  | 60 | 30 |
| glutathione           | 344.167 | 166.126 | 6.4  | 30 | 30 |
| glutathione disulfide | 685.311 | 166.126 | 9.4  | 30 | 45 |
| cystathione           | 295.226 | 170.103 | 6.9  | 30 | 30 |

### Bibliography supporting information

1. Chen, L.; Ducker, G. S.; Lu, W.; Teng, X.; Rabinowitz, J. D. *Anal. Bioanal. Chem.* **2017**, *409*, 5955-5964.
2. Ringling, C.; Rychlik, M. *Anal. Bioanal. Chem.* **2017**, *409*, 1815-1825.
3. Ringling, C.; Rychlik, M. *Eur. Food Res. Technol.* **2013**, *236*, 17-28.
4. Kiekens, F.; Van Daele, J.; Blancquaert, D.; Van Der Straeten, D.; Lambert, W. E.; Stove, C. P. *J. Chromatogr. A* **2015**, *1398*, 20-28.
5. Haandel, L.; Becker, M. L.; Williams, T.; Stobaugh, J.; Leeder, J. S. *Rapid Commun. Mass Spectrom.* **2012**, *26*, 1617-1630.
6. Kwon, Y. K.; Lu, W.; Melamud, E.; Khanam, N.; Bognar, A.; Rabinowitz, J. D. *Nat. Chem. Biol.* **2008**, *4*, 602-608.
7. Lu, W.; Kwon, Y. K.; Rabinowitz, J. D. *J. Am. Soc. Mass Spectrom.* **2007**, *18*, 898-909.
8. Garratt, L. C.; Ortori, C. A.; Tucker, G. A.; Sablitzky, F.; Bennett, M. J.; Barrett, D. A. *Rapid Commun. Mass Spectrom.* **2005**, *19*, 2390-2398.
